# Supplementary material for: Poly(norepinephrine) as a functional bio-interface for neuronal differentiation on electrospun fibers
Source: Royal Society of Chemistry journal article supplement (doi:10.1039/c5cp00413f), 2015-01-01
Supplement: c5cp00413f1.pdf [file c5cp00413f1.pdf]

## Electronic Supplementary Information

### Poly(norepinephrine) as a functional bio-interface for neuronal differentiation on electrospun fibers

Mehmet Berat Taskin,<sup>a</sup> Ruodan Xu,<sup>a</sup> Huiling Zhao,<sup>a</sup> Xueqin Wang,<sup>a</sup> Mingdong Dong,<sup>a</sup> Flemming Besenbacher<sup>a</sup> and Menglin Chen<sup>a\*</sup>

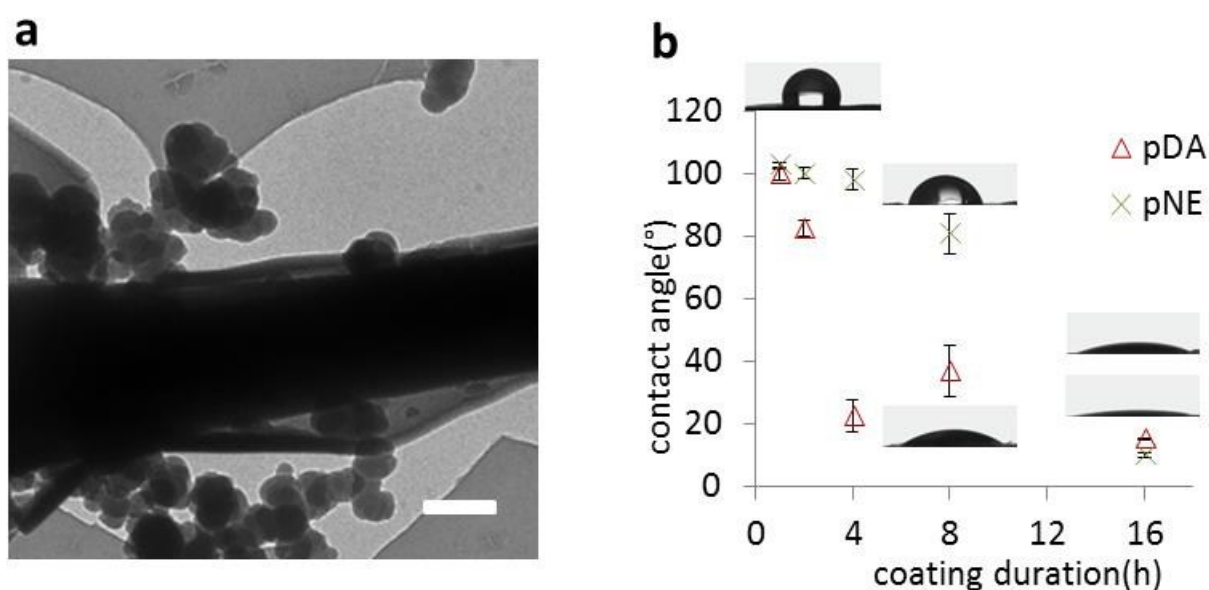

**Figure S1** (a) The TEM picture of pDA coated PLCL fibers, scale bar 400 nm; (b) Over time contact angle (CA) measurements of pNE and pDA coated random PLCL fibers. Drop shape images of PLCL fibers after 0h, 4h, 8h and 16h of pNE and pDA coating were shown

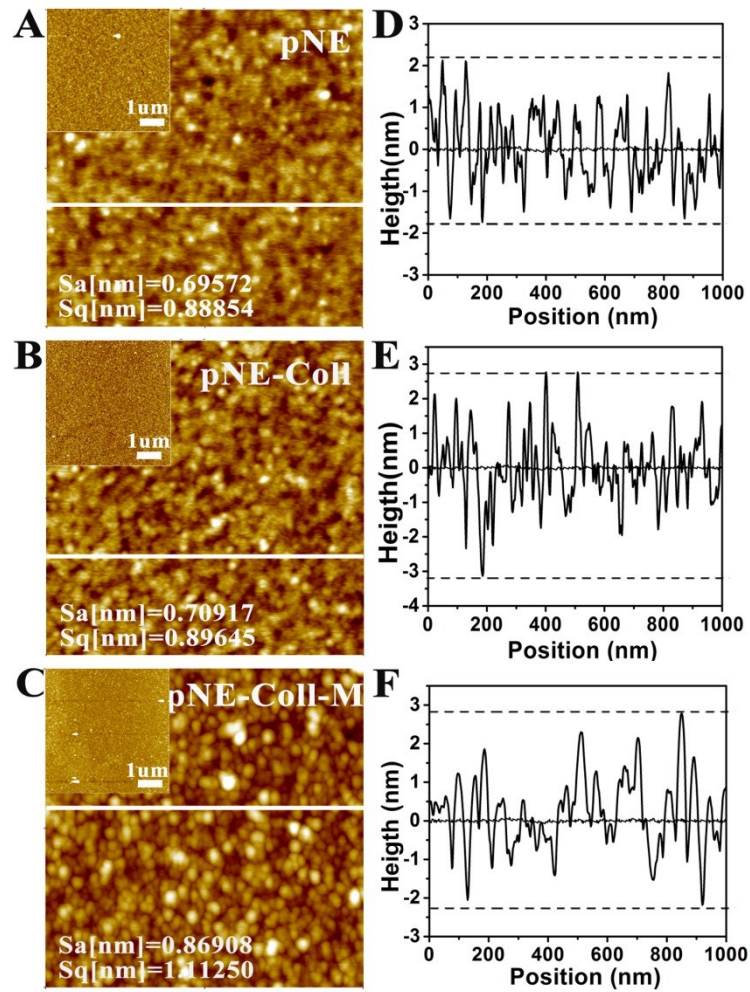

**Figure S2** (A-C): AFM images ( $1\mu\text{m}\times 1\mu\text{m}$ ) for the topological characteristics of three mica films functionalized subsequently with pNE, Collagen (pNE-Coll), and culture medium (pNE-Coll-M). All insets are AFM images with  $5\mu\text{m}\times 5\mu\text{m}$  scanning range. (D,E,F): typical cross profiles corresponding to the lines in the images (A), (B) and (C), respectively.
